# Supplementary material
Source: PubMed Central journal article supplement (PMC5219891)
Supplement: NIHMS673445-supplement.pdf [file NIHMS673445-supplement.pdf]

## Supplemental Materials

### **The blue light-dependent phosphorylation of the CCE domain determines the photosensitivity of Arabidopsis CRY2**

Qin Wang<sup>1,2,6,7</sup>, William D. Barshop<sup>3,7</sup>, Mingdi Bian<sup>4,7</sup>, Ajay A. Vashisht<sup>3</sup>, Reqing He<sup>2</sup>,  
Xuhong Yu<sup>6</sup>, Bin Liu<sup>5</sup>, Paula Nguyen<sup>6</sup>, Xuanming Liu<sup>2</sup>, Xiaoying Zhao<sup>2\*</sup>, James A.  
Wohlschlegel<sup>3</sup>, Chentao Lin<sup>6\*</sup>

1 Basic Forestry and Proteomics Research Center, Fujian Agriculture and Forestry University, Fuzhou, China; 2 Hunan Province Key Laboratory of Plant Functional Genomics and Developmental Regulation, College of Biology, Hunan University, Changsha 410082, China; 3 Department of Biological Chemistry, University of California, Los Angeles, CA 90095, USA; 4 Laboratory of Soil and Plant Molecular Genetics, College of Plant Science, Jilin University, Changchun 130062, China; 5 Institute of Crop Science, Chinese Academy of Agricultural Sciences, Beijing, China, 6 Department of Molecular, Cell & Developmental Biology, University of California, Los Angeles, CA90095, USA.

7. Those authors contributed equally

\*: Corresponding authors

Supplemental Table 1

| Modified Residue(s) | Phosphopeptide Localization          | XCorr | $\Delta C_n$ | $\Delta ppm$ | phosphoRS Probability | Normalized Ratio |
|---------------------|--------------------------------------|-------|--------------|--------------|-----------------------|------------------|
| pS(598)             | NLEGIQD <b>S</b> SDQITTSLGK          | 4.233 | 0.585        | 2.2          | 99.7433               | 2.2606           |
| pS(599)             | NLEGIQD <b>S</b> DQITTSLGK           | 4.683 | 0.527        | 1.0          | 99.8314               | 3.3265           |
| pS(605)             | NLEGIQDSSDQITT <b>S</b> LGK          | 4.418 | 0.586        | 2.0          | 99.9999               | 3.3448           |
| pS(598)/pS(605)     | NLEGIQD <b>S</b> SDQITT <b>S</b> LGK | 2.894 | 0.539        | 2.7          | 99.5195               | 17.0327          |

Table S1. Blue light-induced accumulation of the phosphopeptides of CRY2.

Sites of phosphorylation are indicated by amino-acid residue position(s). All included peptides have an estimated spectrum-level false positive rate of less than 5% and a phosphosite localization probability of greater than 99% by the phosphoRS algorithm. Metrics of identification quality, XCorr,  $\Delta C_n$  and  $\Delta ppm$  were taken from the ProLuCID search outputs. Normalized peak ratios were calculated between blue light and dark conditions (see Methods).

Supplemental Table 2

|                       | WT       | <i>cry1cry2</i> | CRY2      | <i>4sA</i> | <i>6sA</i> | <i>8sA</i> | <i>10sA</i> | <i>13sA</i> |
|-----------------------|----------|-----------------|-----------|------------|------------|------------|-------------|-------------|
| Hypocotyl length (mm) | 2.25±0.4 | 8.78±0.7        | 1.43±0.4  | 2.0±0.1**  | 3.3±0.5*** | 4.1±0.2*** | 6.18±0.5*** | 6.25±0.5*** |
| Days to flower (d)    | 33.0±1.9 | 62.3±4.9        | 32.93±1.8 | 32.9±1.6   | 33.0±1.9   | 33.5±1.5   | 37.0±3.3**  | 37.1±3.2**  |
| Leaf number           | 13.7±0.8 | 38.0±2          | 14±0.6    | 13.8±1.2   | 14±1.3     | 14.2±1.1   | 17.4±1.9*** | 16.5±1.6*** |
|                       |          |                 |           | <i>4sD</i> | <i>6sD</i> | <i>8sD</i> | <i>10sD</i> | <i>13sD</i> |
| Hypocotyl length (mm) | --       | --              | --        | 1.96±0.1** | 1.93±0.4*  | 4.1±0.6*** | 5.43±0.5*** | 5.4±0.4***  |
| Days to flower (d)    | --       | --              | --        | 32.9±2.3   | 32.9±1.8   | 33.6±1.6   | 35.0±2.1*   | 35.2±2.3*   |
| Leaf number           | --       | --              | --        | 14.2±0.6   | 13.5±1.1   | 14.2±0.8   | 14.4±1.2    | 14.1±1.7    |

Table S2. A statistical analysis of the effects of serine substitution mutations in CRY2 on hypocotyl elongation in *Arabidopsis*

Results represent the mean ± SD (n= 15 to 20), the p values of Turkey's LSD Test for the comparison between CRY2 and serine substitution mutations are shown.

Supplemental Figure 1

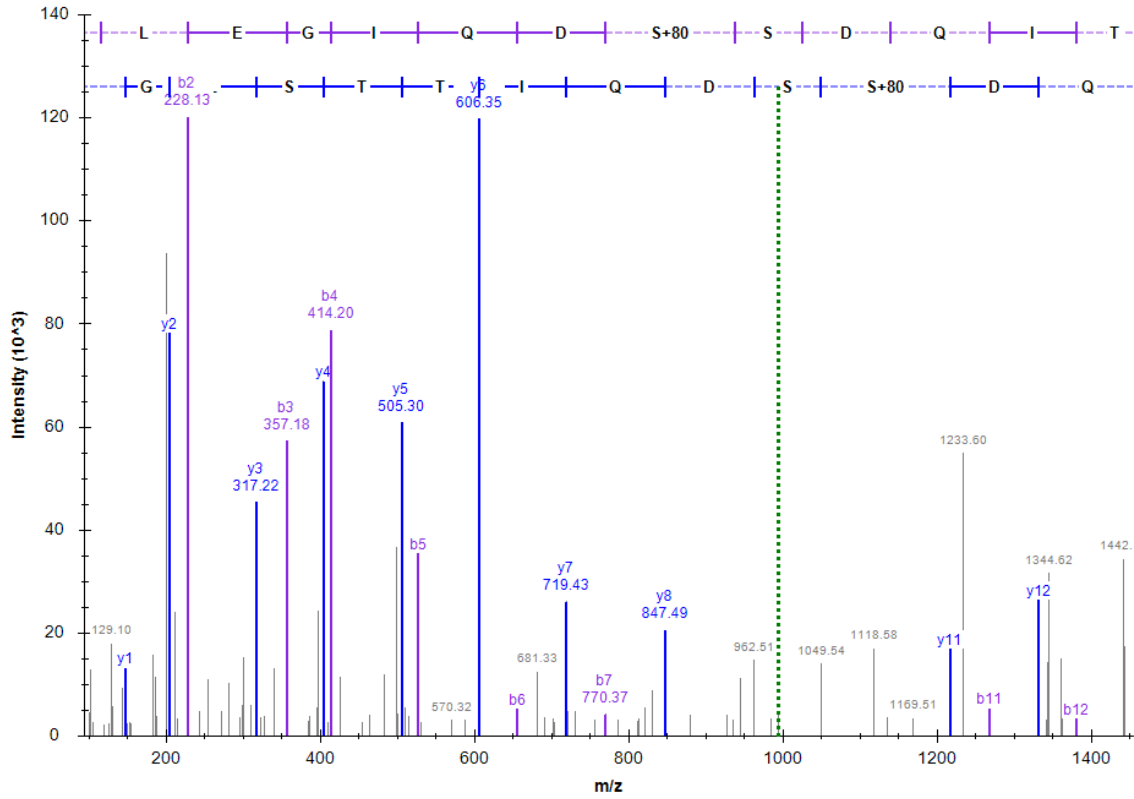

Fig. S1. A representative tandem mass spectrum of the NLEGIQDpSSDQITSLGK peptide (pS598)

Fragments matched within 10ppm are annotated as either the B-ions (purple) or Y-ions (blue) series. The green dashed line indicates precursor m/z.

Supplemental Figure 2

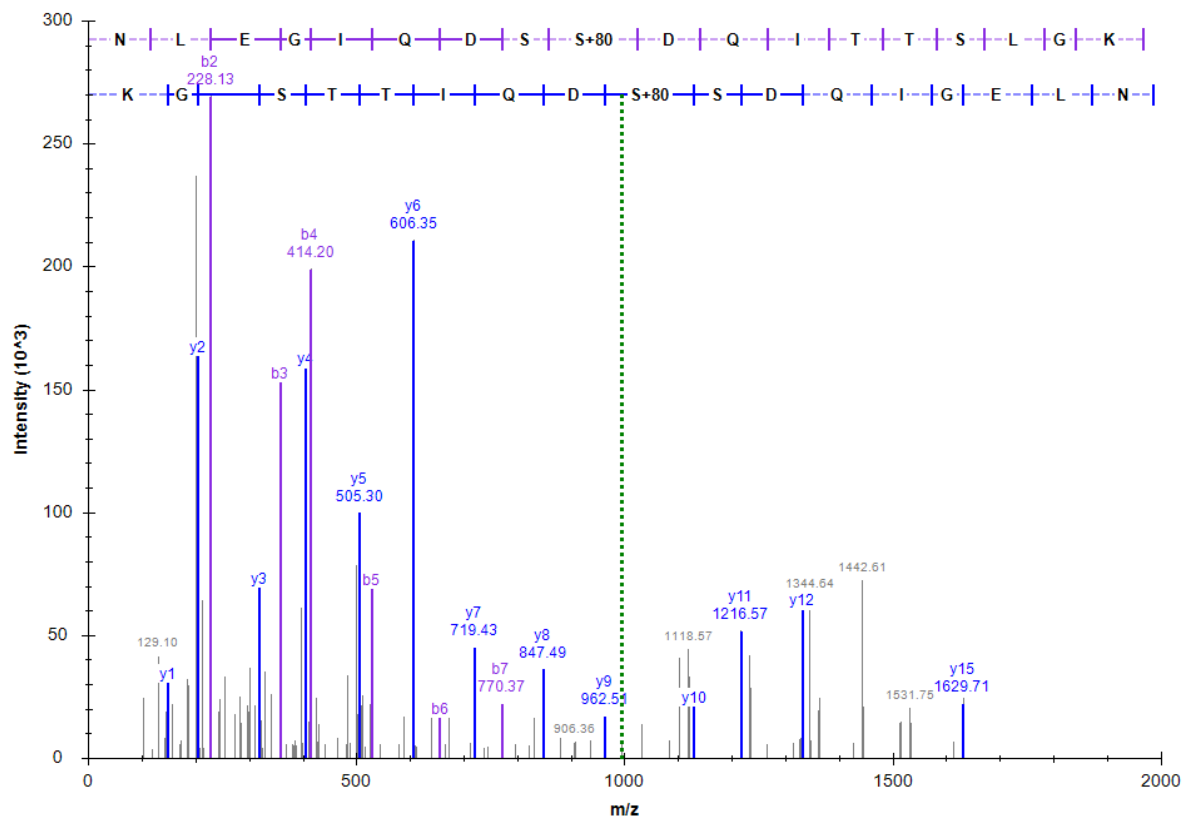

Fig. S2. A representative tandem mass spectrum of the NLEGIQDS<sub>p</sub>SDQITTSLGK peptide (pS599)

Fragments matched within 10ppm are annotated as either the B-ions (purple) or Y-ions (blue) series.

Supplemental Figure 3

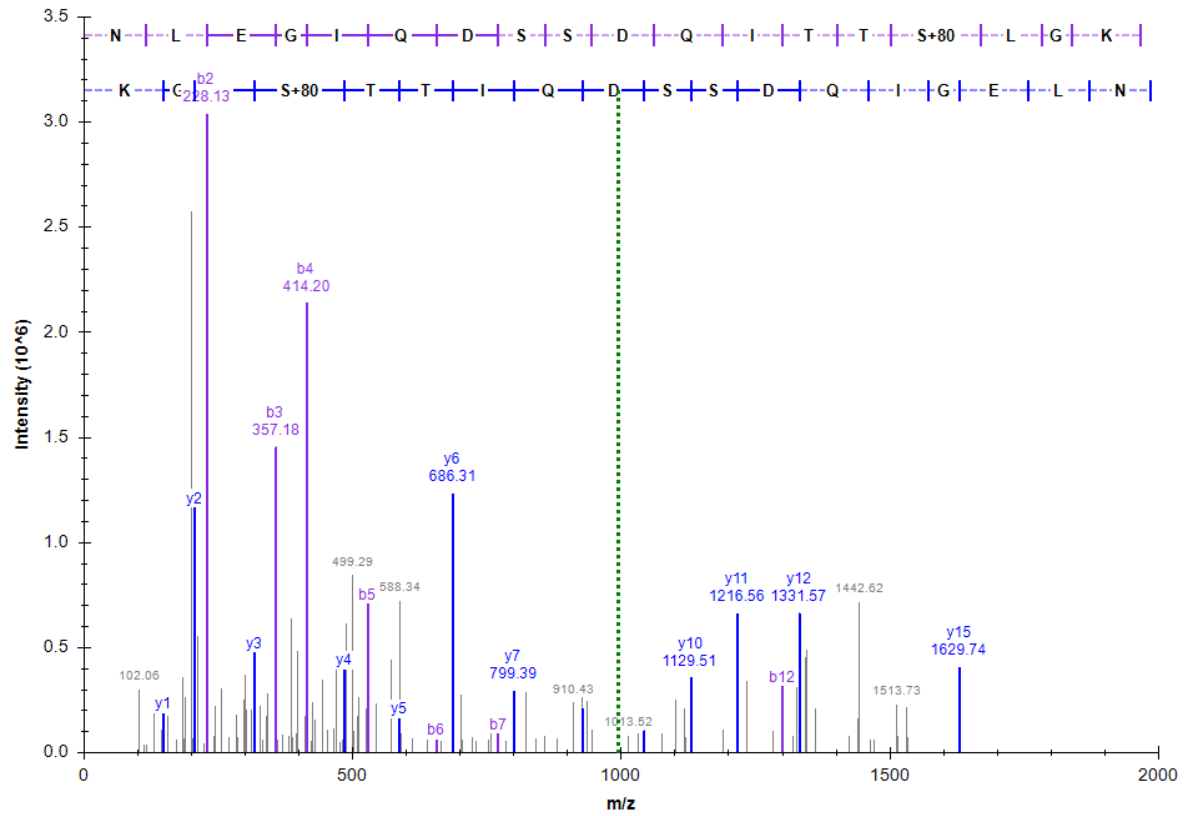

Fig. S3. A representative tandem mass spectrum of the NLEGIQDSSDQITTpSLGK peptide (pS605)

Fragments matched within 10ppm are annotated as either the B-ions (purple) or Y-ions (blue) series..

Supplemental Figure 4

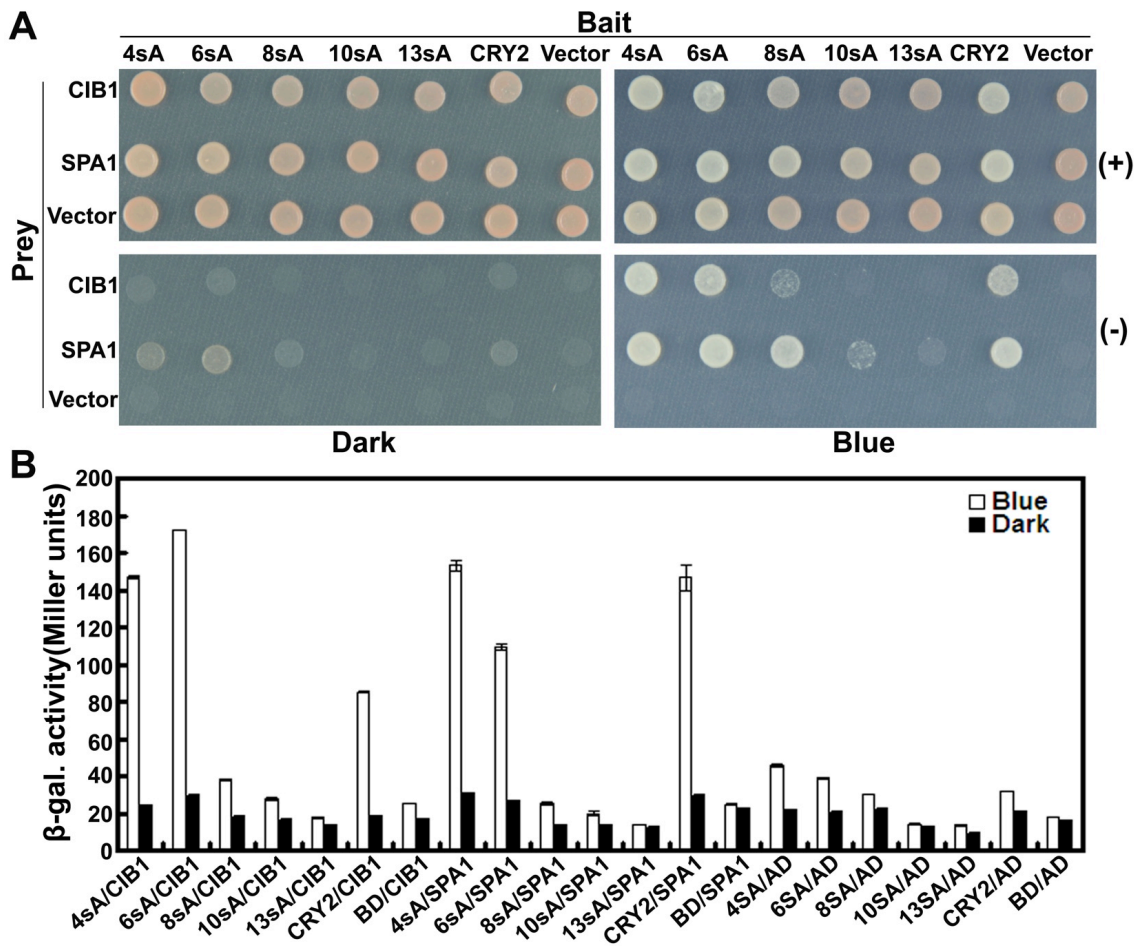

**Fig. S4. Yeast two-hybrid assays showing that the serine-substitution mutations of CRY2 impaired its activity to interact with SPA1 and CIB1 in yeast cells.** (A) Histidine auxotrophy assay showing interaction between serine-substitution mutations of CRY2 and SPA1 or CIB1 in blue light (Blue,  $25 \mu\text{mol m}^{-2} \text{s}^{-1}$ ) or in the dark (Dark). The positive controls of the CRY2-SPA1 pair and the CRY2-CIB1 pair, and the negative control of pGADT7 (prey vector)-pBridge (bait vector) pair are included. (B)  $\beta$ -galactosidase activity liquid assay showing interaction between serine-substitution mutations of CRY2 and SPA1 and CIB1 in blue light (Blue,  $75 \mu\text{mole m}^{-2} \text{s}^{-1}$ ) or in the dark (Dark). Miller units were calculated to present the activity of  $\beta$ -galactosidase.
